# Supplementary material for: Weather Factors Associated with Reduced Risk of Dengue Transmission in an Urbanized Tropical City
Source: MDPI journal article supplement (doi:10.3390/ijerph19010339), 2021-12-29
Supplement: s1 [file s1]

Table S1: Epidemiological characteristics of dengue cases in Singapore from 2012-2019

|       | Host            |                       |                          |              |                    | Virus          |                |                |                | Vector                |                                                     |
|-------|-----------------|-----------------------|--------------------------|--------------|--------------------|----------------|----------------|----------------|----------------|-----------------------|-----------------------------------------------------|
| Year  | Number of cases | Incidence per 100,000 | Number of imported cases | Total deaths | Case-fatality rate | Serotype 1 (%) | Serotype 2 (%) | Serotype 3 (%) | Serotype 4 (%) | Aedes House Index (%) | Clusters as major breeding sites (10 or more cases) |
| 2012  | 4,632           | 82.2                  | 263                      | 2            | 0.0                | 19.4           | 74.1           | 5.7            | 0.8            | 0.28                  | 328 (21)                                            |
| 2013  | 22,170          | 404.9                 | 307                      | 8            | 0.1                | 61.8           | 24.6           | 11.6           | 2.0            | 0.30                  | 1,475 (188)                                         |
| 2014  | 18,326          | 325.6                 | 514                      | 6            | 0.1                | 79.4           | 18.0           | 2.5            | 0.2            | 0.26                  | 1,418 (137)                                         |
| 2015  | 11,294          | 196.1                 | 438                      | 6            | 0.1                | 43.2           | 44.5           | 11.2           | 1.1            | 1.24                  | 1,114 (108)                                         |
| 2016  | 13,085          | 229.1                 | 195                      | 12           | 0.2                | 29.0           | 51.1           | 18.4           | 1.5            | 1.2                   | 1,432 (104)                                         |
| 2017  | 2,767           | 44.9                  | 249                      | 2            | 0.04               | 24.1           | 45.1           | 21.3           | 9.5            | 0.58                  | 197 (11)                                            |
| 2018* | 3,283           | 54.4                  | 215                      | 5            | 0.1                | NR             | NR             | NR             | NR             | 0.96                  | 243 (29)                                            |
| 2019# | 16,100          | 282.3                 | NR                       | 20           | 0.12               | NR             | NR             | NR             | NR             | NR                    | NR                                                  |

\*NR figures were not reported due to a change in the Ministry of Health's annual communicable diseases report

#NR figures as the 2019 communicable disease report has not been published at the time of writing this paper. Incidence per 100,000 calculated using population figures from Singapore's Department of Statistics

Table S2: Estimated parameters of distributed lag non-linear model

| Meteorological Factor | QAIC     | Maximum Lagged Number of Weeks | $\delta_1$ | $\delta_2$ |
|-----------------------|----------|--------------------------------|------------|------------|
| PSI                   | 4955.54  | 16                             | 4          | 4          |
| Total Rainfall        | 4969.682 | 15                             | 6          | 3          |
| Mean Temperature      | 5109.439 | 16                             | 2          | 5          |
| Max Temperature       | 5100.402 | 16                             | 2          | 5          |
| Min Temperature       | 5141.385 | 16                             | 2          | 5          |
| Wind Speed            | 4996.581 | 5                              | 4          | 5          |

Table S3: Predictive model performance using 2012-2018 data as training data and 2019 data as test data

|                                  | MAE  | RMSE |
|----------------------------------|------|------|
| Base model                       | 46.1 | 57.3 |
| Base model with PSI              | 44.8 | 51.5 |
| Base model with Rainfall         | 43.7 | 59.6 |
| Base model with Mean temperature | 43.5 | 52.3 |
| Base model with Max temperature  | 41.4 | 55.9 |
| Base model with Min temperature  | 44.1 | 50.8 |

Cross Correlation Graph

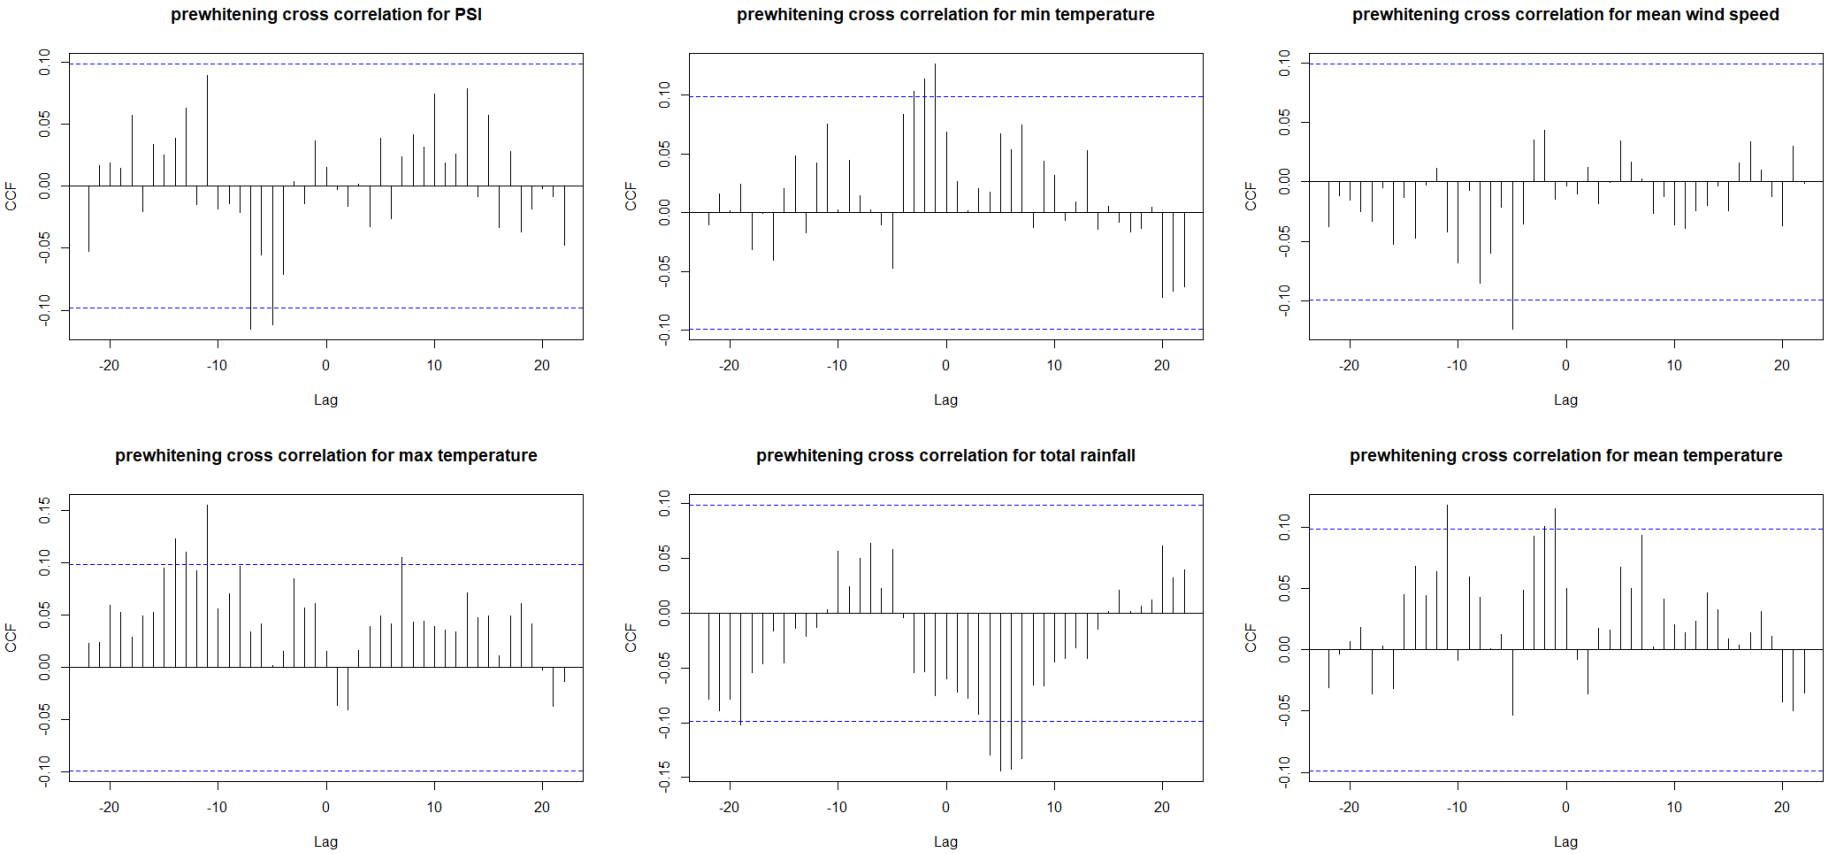

Figure S1: Prewhitening cross correlation graphs between six weather factors and dengue cases

## ARIMA Model

With an obvious trend detected in the time series data, differencing technique was conducted to make the time series stationary and stabilize the variance using logarithm transformation. Autocorrelation function graph and partial autocorrelation function suggested significant autocorrelation at lag 1 (Figure S1). Hence, the final model turns to be ARIMA (1, 1, 0). Residual diagnostics was conducted through Figure S2. P-value of 'Ljung-Box' test at significance level 0.05 with 10 lags was 0.3686.

However, some significant signals appeared at lag 43 and lag 49 (Figure S1). These spikes might imply some seasonal patterns of dengue. From Figure 1, peaks were observed around mid-year period during 2012-2015, 2019. In 2016, peak appeared at start of year. Although seasonal patterns were apparent, the seasonal period was not strictly 52 weeks (one year). SARIMA (0, 1, 1)(0, 1, 1)<sub>52</sub> was tried but Ljung-Box test was not passed after lag 43 (Figure S2). Thus seasonal patterns in this weekly data should be captured by a more sophisticated model.

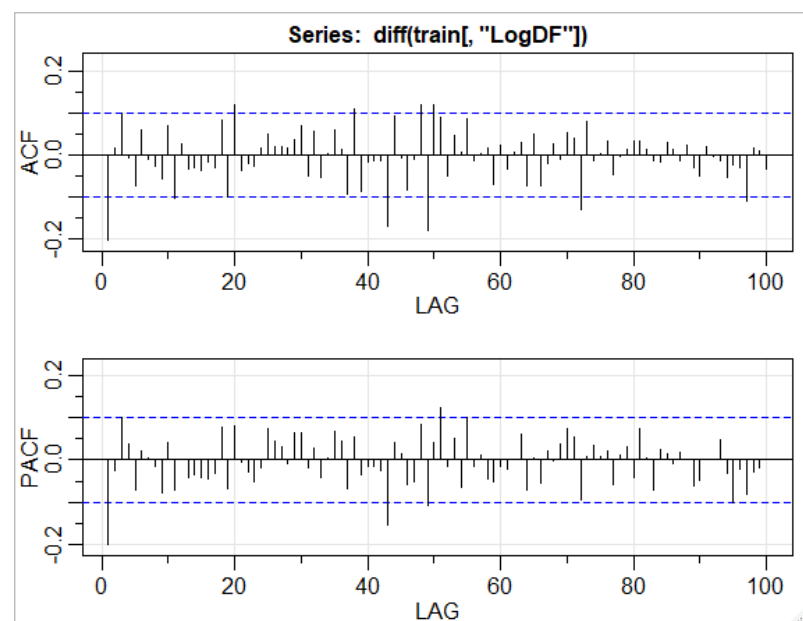

Figure S2: Acf & Pacf graphs of differenced time series of weekly dengue cases with logarithm transformation

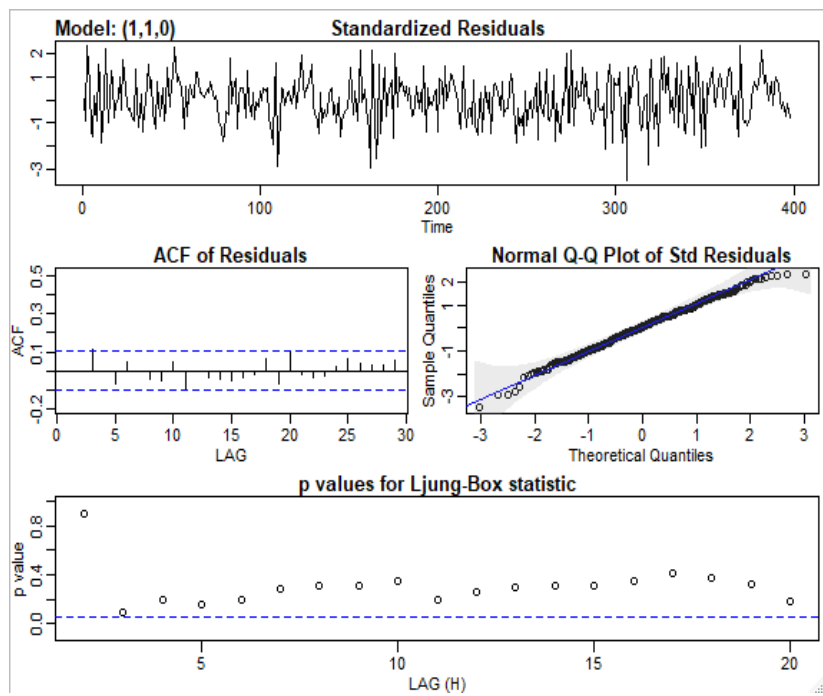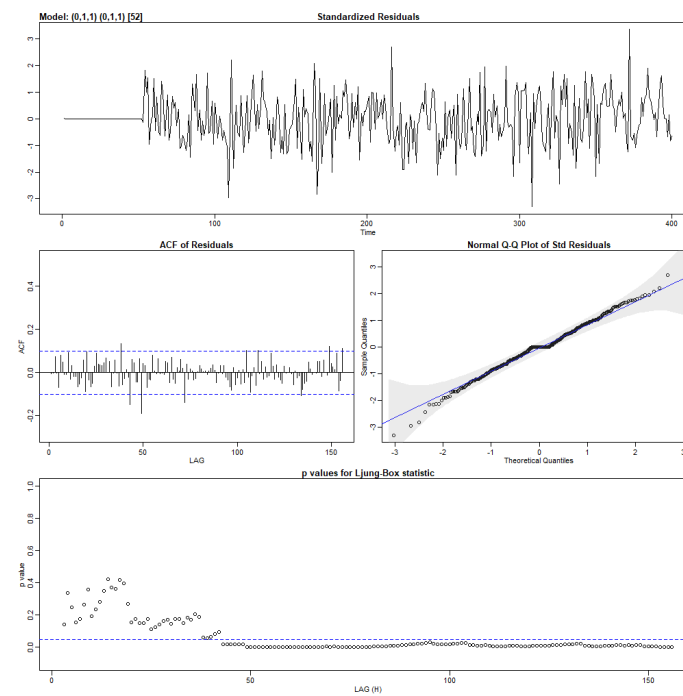

Figure S3: Residual plots and Ljung-Box tests (Residual Diagnostics): Left panel is ARIMA(1, 1, 0) and right panel is SARIMA (0, 1, 1)(0, 1, 1)<sub>52</sub>

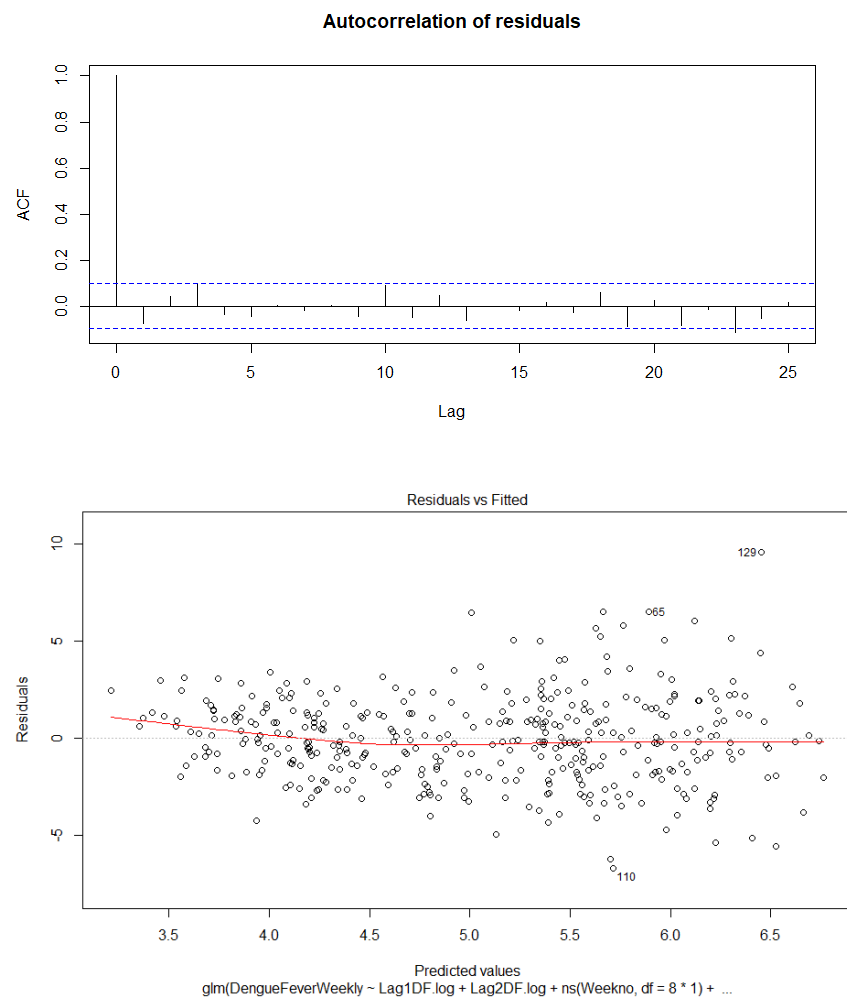

Figure S4: Diagnosis of the residual autocorrelation and overdispersion

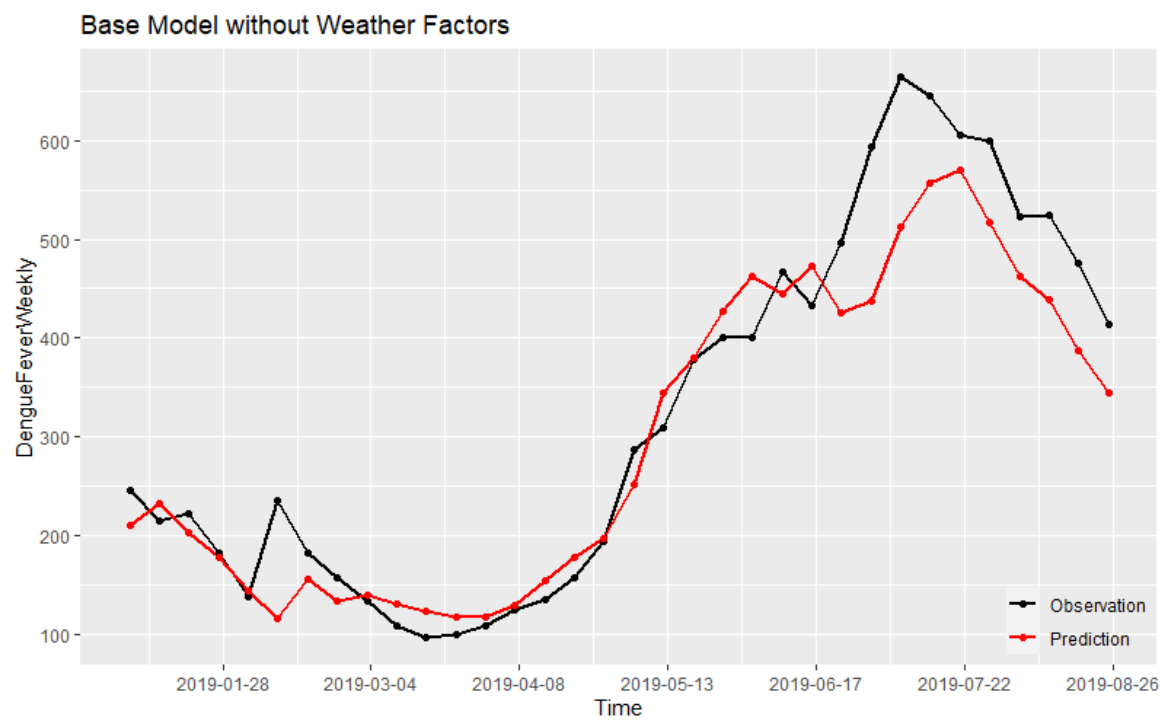

Figure S5: Prediction model of dengue incidence without weather factors

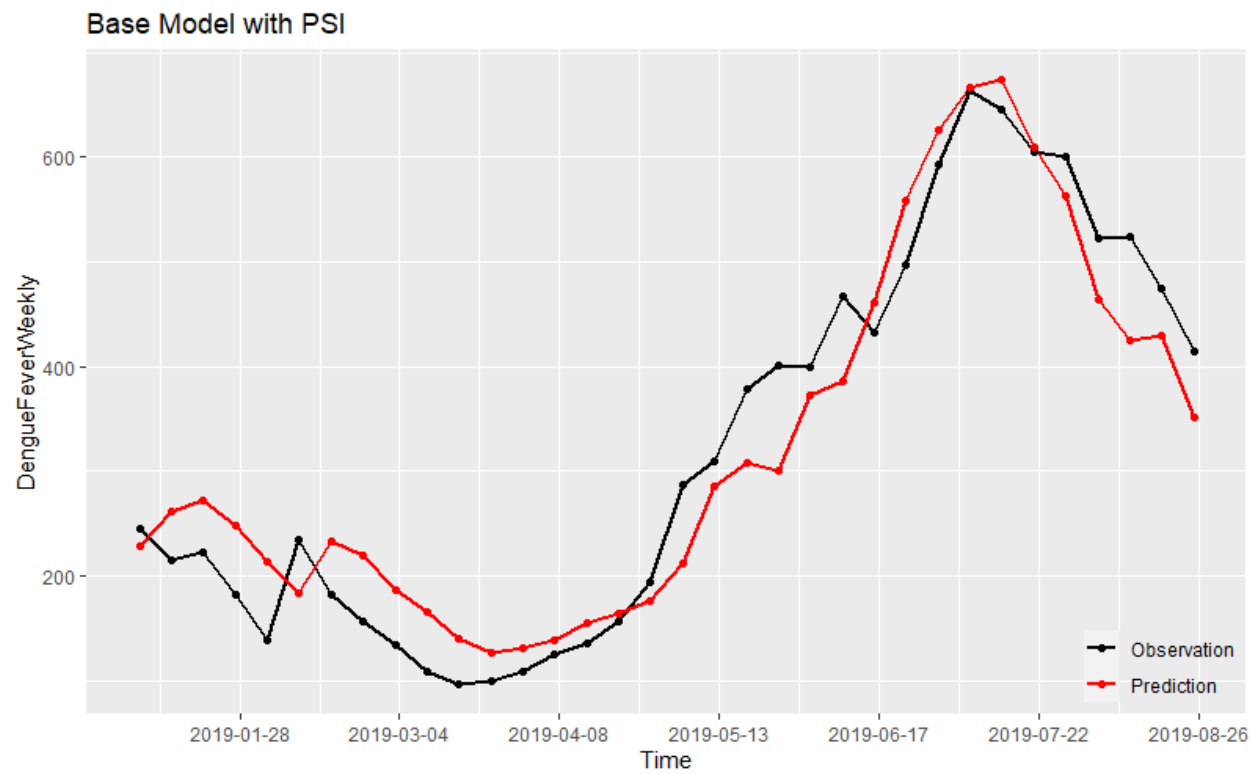

Figure S6: Prediction model of dengue incidence with PSI only

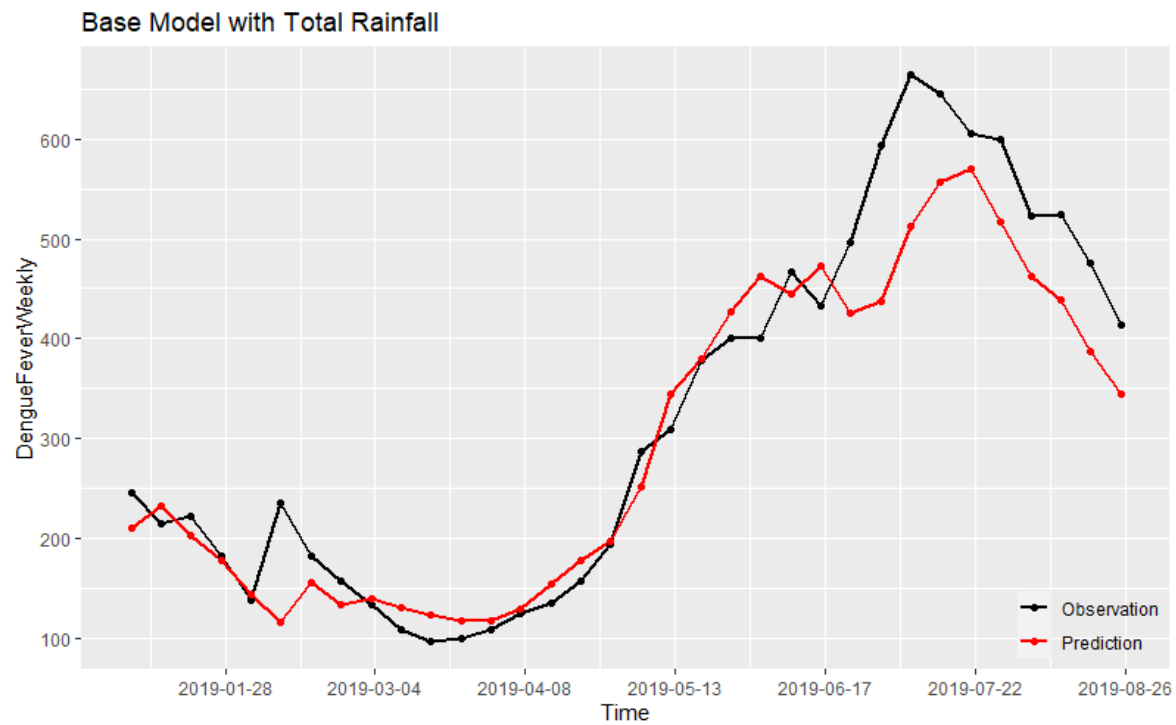

Figure S7: Prediction model of dengue incidence with rainfall only

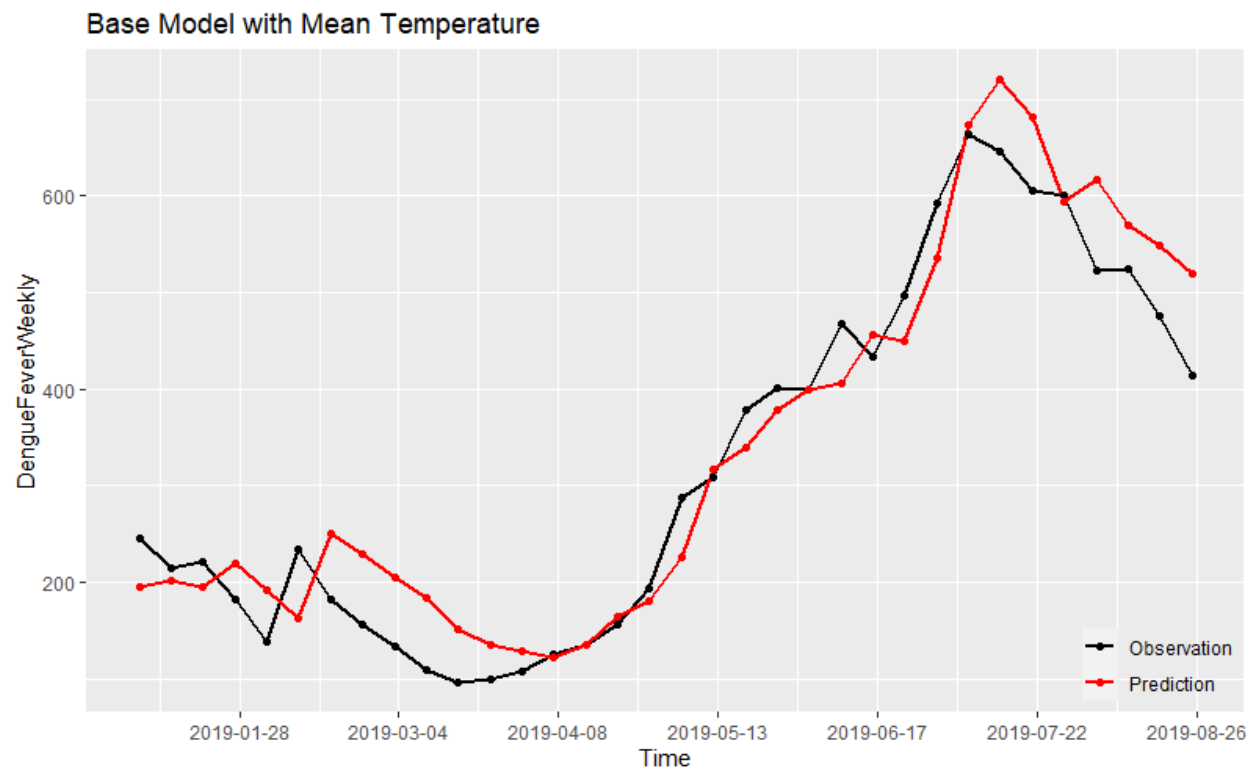

Figure S8: Prediction model of dengue incidence with mean temperature only

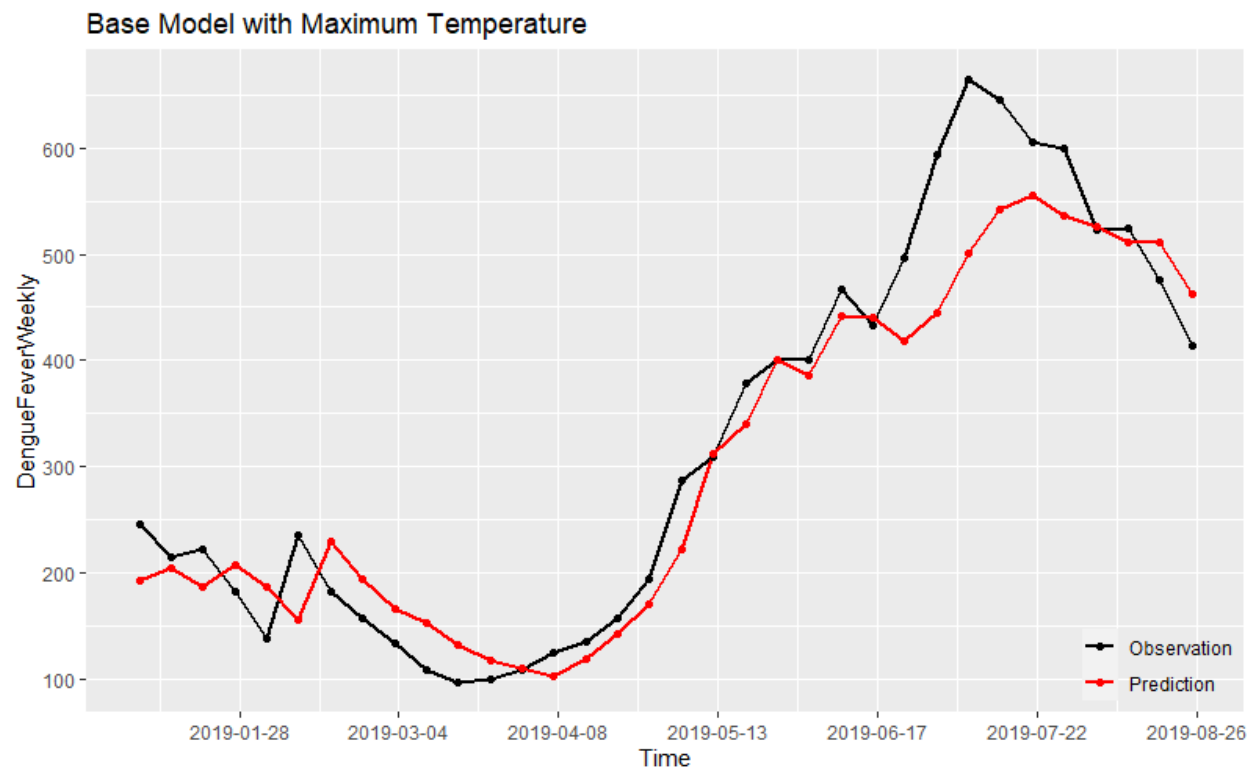

Figure S9: Prediction model of dengue incidence with maximum temperature only

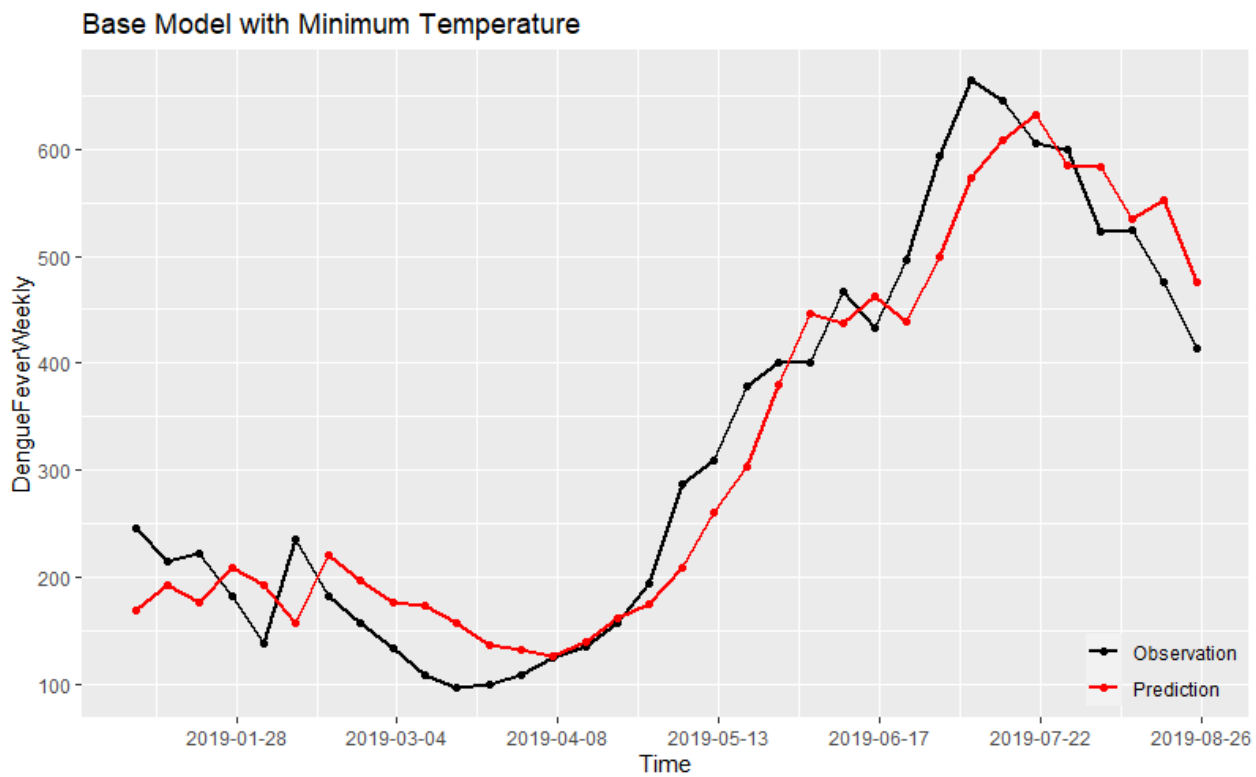

Figure S10: Prediction model of dengue incidence with minimum temperature only

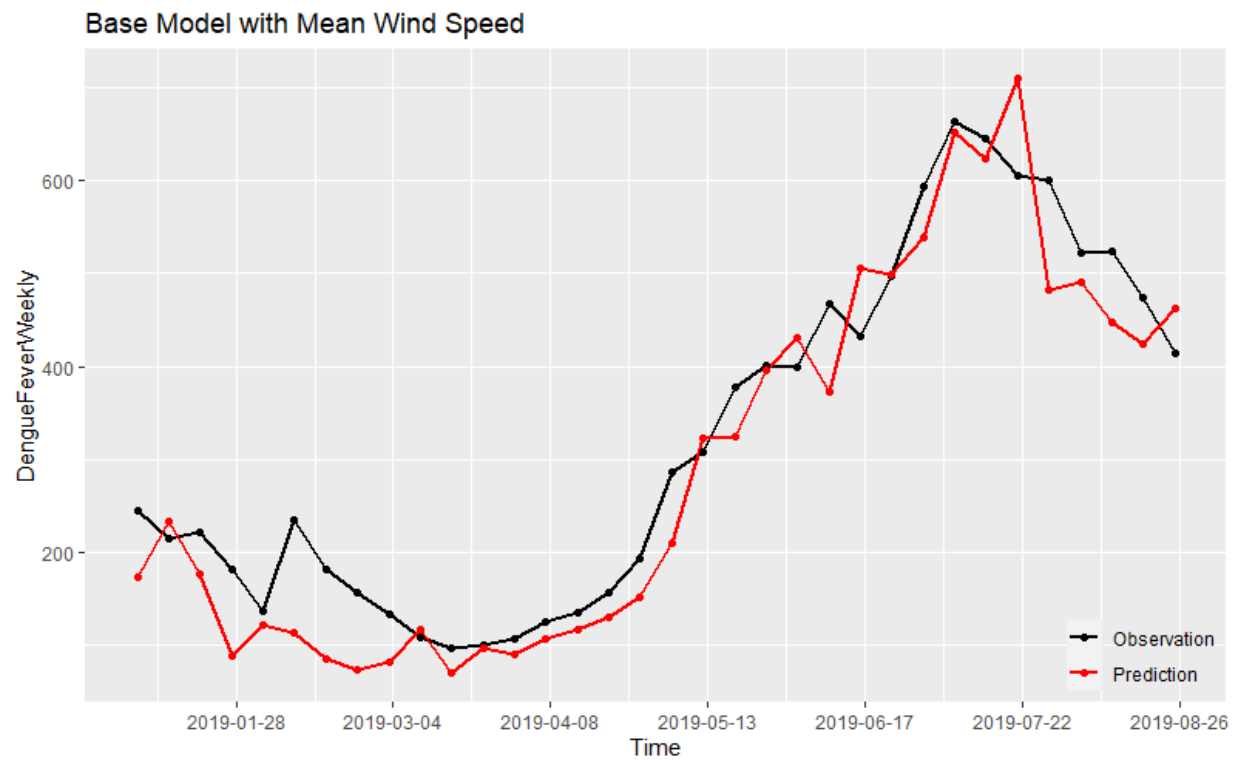

Figure S11: Prediction model of dengue incidence with wind speed only

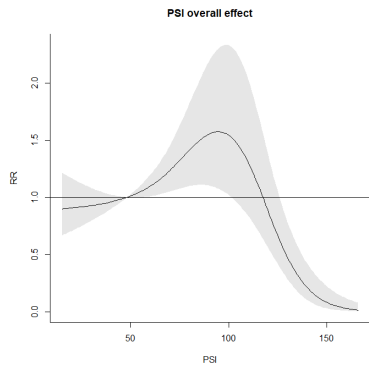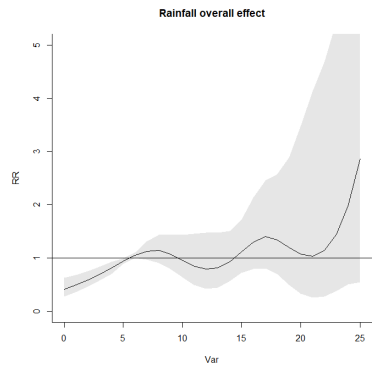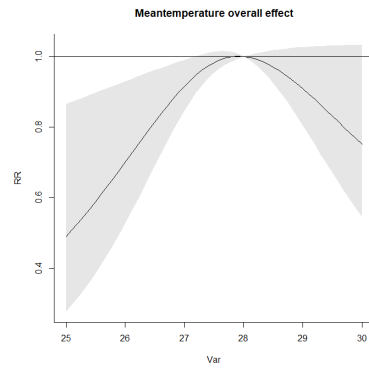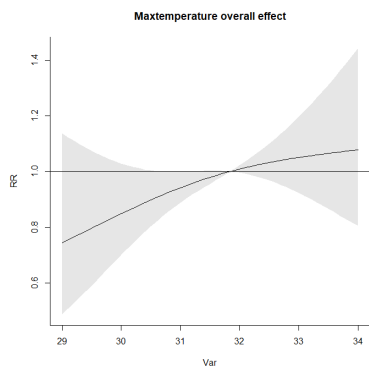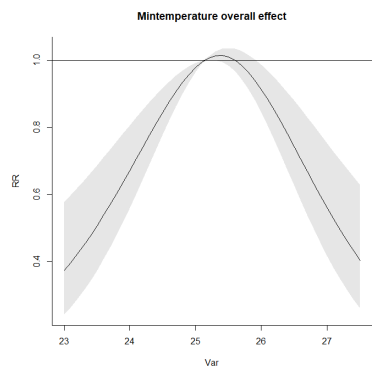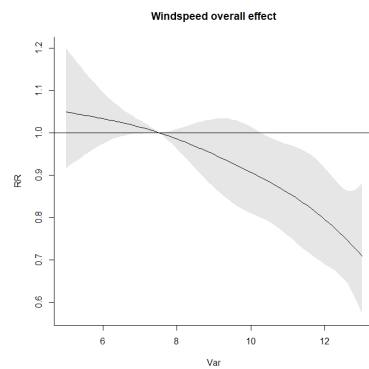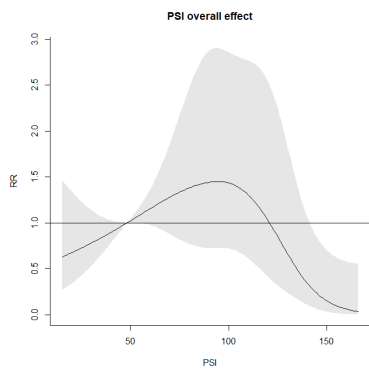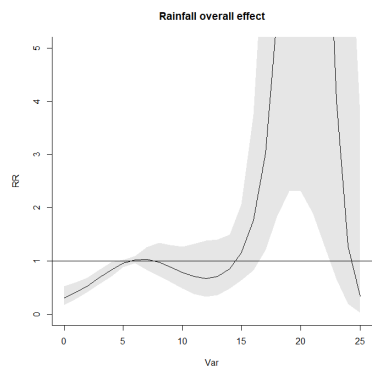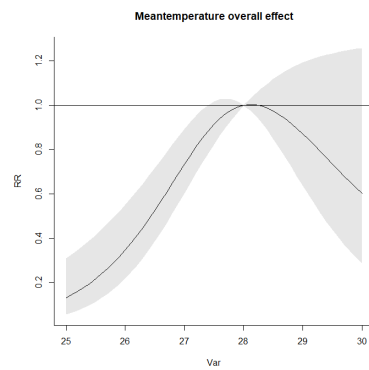

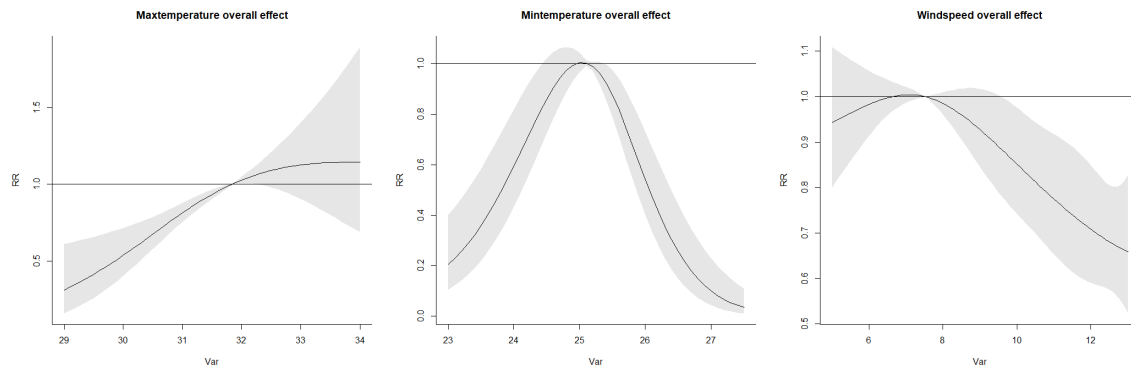

Figure S12 (a): Overall effect with variation in  $\delta$ . 2df per year (b): Overall effect with variation in  $\delta$ . 3df per year

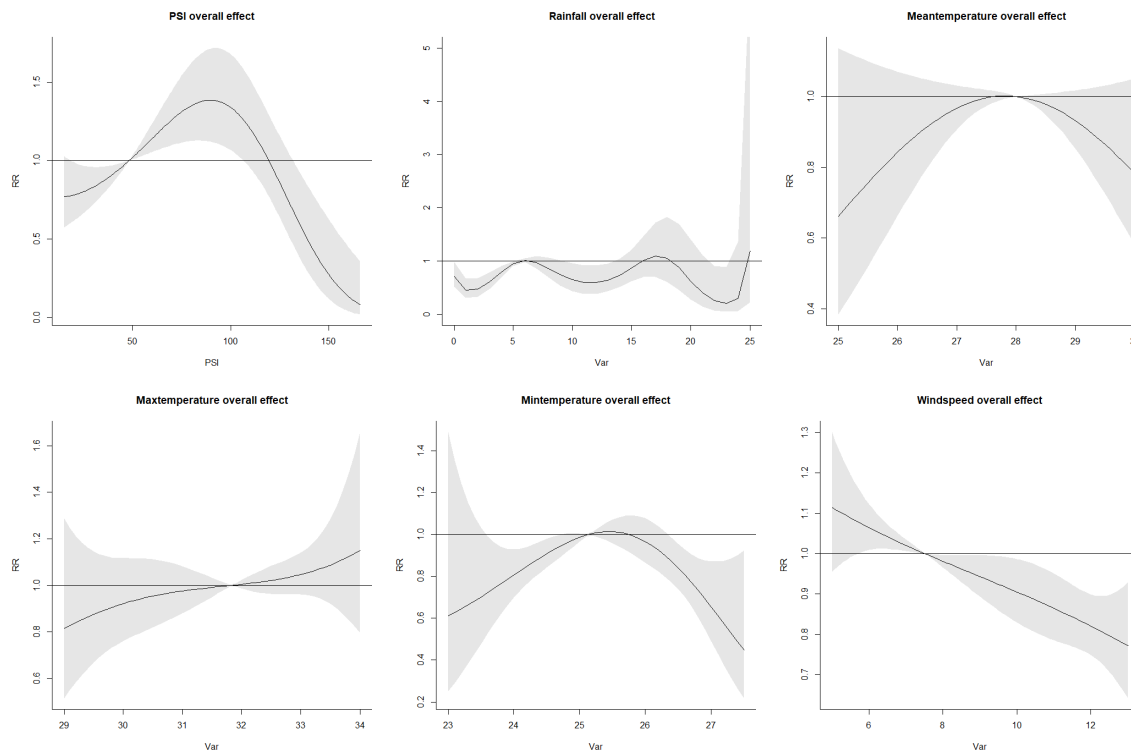

Figure S13: Overall effect of 6 weather variables using polynomial functions
